# Supplementary material
Source: HighWire-hosted journal article supplement (https://cmaj.ca/highwire/filestream/59290/field_highwire_adjunct_files/0/184_13.pdf)
Supplement: 184_13.pdf [file 184_13.pdf]

## ÉDITORIAL

## Le Canada ne réussit pas à protéger son approvisionnement en médicaments

Matthew B. Stanbrook MD PhD, Rosemary M. Killeen RPh BScPhm

Pour la version anglaise de l'éditorial, veuillez consulter la page 1449.

**P**roblème mondial qui touche les pharmaciens et les hôpitaux partout au Canada, les pénuries de médicaments sont devenues fréquentes, en grande partie imprévisibles et généralisées depuis le milieu de 2010. Les pénuries occasionnelles de médicaments ne sont pas nouvelles, mais le nombre et la variété des médicaments en cause récemment sont sans précédent. La situation ne s'améliorera pas dans l'avenir prévisible si les gouvernements canadiens, tant les provinces et territoires, ne changent pas radicalement leur façon d'y réagir.

Les deux catégories de médicaments particulièrement touchées comprennent les antiépileptiques (p. ex., phénytoïne), les agents chimiothérapeutiques (p. ex., docetaxel), les antibiotiques (p. ex., amoxicilline/clavulanate et céphalexine) et les anesthésiants (p. ex., propofol). La plupart des médicaments en rupture de stock récemment sont des médicaments génériques, en particulier les médicaments injectables stériles. Pour les Canadiens, les pénuries ont notamment aggravé des problèmes médicaux chroniques, entraîné des erreurs médicales, produit des effets indésirables causés par de nouveaux médicaments substitués, entraîné l'annulation d'interventions chirurgicales et d'actes médicaux et alourdi les coûts pour les patients et le système de santé<sup>1-3</sup>.

Même si les causes des pénuries de médicaments sont multiples et complexes<sup>1</sup>, le manque de préparation du Canada et son incapacité à faire face au problème semblent plus évidents. L'absence de leadership national coordonné et intégré en ce qui concerne la politique sur les médicaments au Canada constitue une caractéristique frappante. En dépit d'avertissements lancés par toutes sortes d'intervenants en 2010 et 2011, la réaction du gouvernement fédéral à ce problème alarmant a été jusqu'à maintenant insuffisante. On a accordé peu d'attention législative à la question jusqu'à ce que l'interruption inattendue et subite de la production au début de 2012 chez Sandoz, fournisseur exclusif de beaucoup de médicaments injectables génériques au Canada, déclenche la tenue d'un débat au Parlement et d'audiences au Comité permanent de la santé de la Chambre des communes<sup>4</sup>.

D'autres pays ont agi plus décisivement. L'Europe a imposé la déclaration préalable des pénuries de médicaments il y a plus d'une décennie<sup>1</sup>. Aux États-Unis, le président Barack Obama a émis un décret présidentiel l'automne dernier qui oblige tous les fabricants de produits pharmaceutiques à informer d'avance la Food and Drug Administration de toute pénurie imminente possible de médicaments. On attribue déjà à cette initiative le crédit

d'avoir multiplié par six le nombre de déclarations des fabricants et par deux les pénuries de médicaments qu'il a été possible d'éviter<sup>5</sup>. Une mesure législative adoptée par le Congrès des États-Unis en juin 2012 a accordé à la FDA d'autres pouvoirs réglementaires dans ce domaine<sup>6</sup>. Or, le gouvernement n'a pas agi de la même façon au Canada où, au lieu de donner à Santé Canada le pouvoir d'imposer la déclaration, la ministre de la Santé compte plutôt sur l'industrie pour établir son propre système de déclaration volontaire. Ce n'est qu'en mars 2012 que la Chambre des communes a adopté une motion non contraignante de l'opposition préconisant la déclaration obligatoire et une stratégie nationale sur l'approvisionnement en médicaments. Le rapport du Comité permanent de la santé n'approuve ni l'une ni l'autre des recommandations, ce qui est révélateur<sup>4</sup>.

Si les gouvernements ne commencent pas à faire preuve de leadership dans ce dossier, qui interviendra dans l'intérêt des patients du Canada ? Le Canada ne peut faire face adéquatement à un problème de cette envergure avec 14 systèmes de santé régionaux indépendants. L'intervention fédérale dans ce dossier est inévitable étant donné que le fédéral a la responsabilité directe de la prestation des soins de santé dans certains domaines (p. ex., communautés autochtones, militaires et détenus des prisons fédérales), sans oublier les lois sur les brevets relatifs aux médicaments et la Loi canadienne sur la santé. De plus, le pouvoir de réglementer les médicaments appartient à Santé Canada, qui a commencé tardivement à informer le public de la pénurie de médicaments et à accélérer l'approbation d'autres fournisseurs de médicaments en pénurie. En fait, le temps que Santé Canada prend pour approuver de nouveaux médicaments et des améliorations des procédés de production de médicaments existants a probablement aggravé les pénuries<sup>1,4</sup>.

Comme premier pas vers une stratégie nationale, il faut établir et maintenir un système de déclaration obligatoire des pénuries imminentes afin que les intervenants à tous les niveaux des soins de santé aient des renseignements suffisants et opportuns sur lesquels appuyer leurs décisions. Avec un leadership national coordonné, le Canada pourrait mettre en œuvre d'autres stratégies afin d'atténuer les pénuries de fournitures vitales : augmenter la réserve nationale de produits pharmaceutiques pour y inclure davantage de médicaments jugés essentiels à la prestation des soins de santé, exiger que les contrats d'approvisionnement portant sur tous les médicaments essentiels prévoient au moins deux fournisseurs, ou établir des

plans d'intervention en cas d'urgence afin de partager les réserves d'un bout à l'autre du Canada et de les renouveler rapidement auprès de fournisseurs internationaux en cas de pénurie. Une influence nationale et le pouvoir législatif pourraient aussi prévoir des incitations afin d'encourager les sociétés pharmaceutiques à abandonner les pratiques d'affaires à l'origine des pénuries. Entre-temps, les gouvernements provinciaux et territoriaux aux doivent faire davantage pour activer leurs propres capacités d'intervention coordonnée, notamment par l'intermédiaire du Conseil de la Fédération.

La population du Canada mérite que ses dirigeants élus écoutent et agissent davantage pour protéger l'approvisionnement de certaines des composantes les plus cruciales de la

prestation des soins de santé. Il est ridicule et intolérable qu'un pays industrialisé et riche comme le Canada ne puisse fournir des médicaments de façon fiable à sa population.

Se rendre à [www.cmaj.ca/lookup/suppl/doi:10.1503/cmaj.121196/-/DC1](http://www.cmaj.ca/lookup/suppl/doi:10.1503/cmaj.121196/-/DC1) pour les références.

**Intérêts concurrents :** Rosemary Killeen a touché des honoraires de Merck Frosst comme conférencière et animatrice. Elle a été examinatrice pour MediResource Inc. et est pharmacienne communautaire pour Shoppers Drug Mart. Voir [www.cmaj.ca/site/misc/cmaj\\_staff.shtml](http://www.cmaj.ca/site/misc/cmaj_staff.shtml) au sujet des intérêts concurrents de Matthew Stanbrook.

**Affiliations :** Matthew Stanbrook est rédacteur adjoint, *JAMC*, et Rosemary Killeen est éditeur-en-chef, *Canadian Pharmacists Journal*.

**Correspondance à :** Éditeur du *JAMC*, [pubs@cmaj.ca](mailto:pubs@cmaj.ca)

## RÉSUMÉS DE RECHERCHE

# Formation des médecins de famille en prise de décision partagée afin de réduire le recours excessif aux antibiotiques contre les infections respiratoires aiguës : essai randomisé en grappe

France Légaré MD PhD, Michel Labrecque MD PhD Michel Cauchon MD, Josette Castel MD MSc, Stéphane Turcotte MSc, Jeremy Grimshaw MB ChB PhD

Pour la version anglaise de ce résumé, veuillez consulter la page 1468.

**Contexte :** Il y a peu d'interventions qui ont prouvé leur efficacité pour réduire le recours excessif aux antibiotiques contre les infections respiratoires aiguës. Nous avons évalué l'effet de DECISION+2, un programme de formation à la prise de décision partagée, sur le pourcentage des patients qui ont décidé de prendre des antibiotiques après avoir consulté un médecin ou un médecin résident.

**Méthodes :** Nous avons procédé à un essai randomisé, regroupé en grappe au niveau de l'unité d'enseignement en médecine familiale, et comportant deux volets : DECISION+2 et témoin. Le programme de formation DECISION+2 comportait un tutoriel en ligne de deux heures suivi d'un colloque interactif de deux heures sur la prise de décision partagée. Le pourcentage des patients qui ont décidé d'utiliser des antibiotiques immédiatement après la consultation a constitué le résultat premier. Nous avons aussi indiqué si les patients croyaient qu'il y avait eu prise de décision partagée. Deux semaines après la première consultation, nous avons déterminé dans quelle mesure les patients se conformaient à la décision, s'il y avait eu une nouvelle consultation et s'ils regrettaient la décision, et nous avons établi l'indice de leur qualité de vie.

**Résultats :** Nous avons comparé les résultats de 181 patients qui ont consulté 77 médecins dans 5 unités d'enseignement en médecine familiale dans le groupe DECISION+2 aux résultats de 178 patients qui ont consulté 72 médecins dans 4 unités d'enseignement en médecine familiale dans le groupe témoin. Le pourcentage des patients qui ont décidé d'utiliser des antibiotiques après la consultation s'est établi à 52,2 % dans le groupe témoin et à 27,2 % dans le groupe DECISION+2 (écart absolu de 25,0 %, risque relatif rajusté de 0,48, intervalle de confiance à 95 % de 0,34 à 0,68). Le programme DECISION+2 a été associé à un rôle plus actif des patients dans la prise de décision ( $Z = 3,9; p < 0,001$ ). Les résultats pour les patients deux semaines après la consultation étaient semblables dans les deux groupes.

**Interprétation :** Le programme de prise de décision en commun DECISION+2 a amélioré la participation des patients à la prise de décision et a réduit le nombre des patients qui décidaient d'utiliser des antibiotiques contre les infections respiratoires aiguës. Cette réduction n'a pas eu d'effet négatif sur les résultats pour les patients deux semaines après la consultation.

**Enregistrement de l'essai :** NCT01116076

**Intérêts concurrents :**  
Aucun déclaré.

Cet article a été revu par les pairs.

**Correspondance à :**  
France Légaré,  
[france.legare@mfa.ulaval.ca](mailto:france.legare@mfa.ulaval.ca)
